# Supplementary material
Source: publisher figshare collection journal article supplement (https://asha.figshare.com/ndownloader/files/38206947)
Supplement: Supplementary file 1 [file 38206947]

**Supplemental Material S1.** 117 pairs or translation equivalents selected for the study, including phonological overlap calculations and instructions.

| Item difficulty | English    | Spanish   | Initial sound | Number of syllables | Consonants | Vowels | COSP |
|-----------------|------------|-----------|---------------|---------------------|------------|--------|------|
| 1               | eyes       | ojos      | 0             | 1                   | 2          | 0      | 3    |
| 2               | cat        | gato      | 1             | 1                   | 2          | 1      | 5    |
| 3               | apple      | manzana   | 0             | 1                   | 0          | 0      | 1    |
| 4               | tree       | arbol     | 0             | 1                   | 1          | 0      | 2    |
| 5               | book       | libro     | 0             | 1                   | 1          | 0      | 2    |
| 6               | telephones | telefonos | 3             | 1                   | 3          | 1      | 8    |
| 7               | banana     | banana    | 3             | 2                   | 3          | 2      | 10   |
| 8               | key        | llave     | 0             | 1                   | 0          | 0      | 1    |
| 11              | elephant   | elefante  | 2             | 1                   | 3          | 1      | 7    |
| 12              | bird       | pajaro    | 1             | 0                   | 0          | 0      | 1    |
| 13              | bicycle    | bicicleta | 3             | 1                   | 3          | 1      | 8    |
| 14              | airplane   | avion     | 0             | 2                   | 1          | 0      | 3    |
| 15              | foot       | pie       | 0             | 2                   | 0          | 0      | 2    |
| 16              | duck       | pato      | 0             | 1                   | 0          | 1      | 2    |
| 17              | heart      | corazon   | 0             | 0                   | 0          | 0      | 0    |
| 18              | ear        | oreja     | 0             | 0                   | 0          | 0      | 0    |
| 19              | scissors   | tijeras   | 1             | 1                   | 1          | 0      | 3    |
| 20              | paint      | pintar    | 3             | 1                   | 3          | 1      | 8    |
| 23              | train      | tren      | 3             | 2                   | 3          | 1      | 9    |
| 25              | leaf       | hoja      | 0             | 1                   | 0          | 0      | 1    |
| 27              | clouds     | nubes     | 0             | 1                   | 1          | 1      | 3    |
| 28              | pillow     | almohada  | 0             | 0                   | 1          | 0      | 1    |
| 29              | tiger      | tigre     | 3             | 2                   | 2          | 0      | 7    |
| 30              | swim       | nadar     | 0             | 1                   | 0          | 0      | 1    |
| 32              | fireman    | bombero   | 0             | 1                   | 1          | 0      | 2    |
| 33              | animals    | animales  | 2             | 1                   | 3          | 1      | 7    |
| 34              | penguin    | pingüino  | 3             | 1                   | 3          | 1      | 8    |
| 35              | cup        | taza      | 1             | 1                   | 0          | 1      | 3    |

|    |            |            |   |   |   |   |   |
|----|------------|------------|---|---|---|---|---|
| 37 | basket     | canasta    | 0 | 1 | 3 | 0 | 4 |
| 38 | bee        | abeja      | 0 | 0 | 2 | 0 | 2 |
| 39 | rug        | tapete     | 0 | 0 | 0 | 0 | 0 |
| 41 | skateboard | patineta   | 0 | 0 | 1 | 1 | 2 |
| 42 | tire       | llanta     | 0 | 1 | 1 | 0 | 2 |
| 43 | bridge     | punte      | 1 | 1 | 0 | 0 | 2 |
| 44 | fruit      | frutas     | 3 | 1 | 3 | 1 | 8 |
| 45 | clothes    | ropa       | 0 | 1 | 0 | 1 | 2 |
| 46 | footprints | huellas    | 0 | 2 | 1 | 0 | 3 |
| 48 | bottles    | botellas   | 3 | 1 | 1 | 0 | 5 |
| 50 | light      | luz        | 3 | 2 | 2 | 0 | 7 |
| 51 | pineapple  | piña       | 3 | 1 | 1 | 1 | 6 |
| 52 | straw      | popote     | 0 | 0 | 1 | 0 | 1 |
| 53 | smoke      | humo       | 0 | 1 | 1 | 2 | 4 |
| 54 | wall       | pared      | 0 | 1 | 0 | 0 | 1 |
| 55 | skeleton   | esqueleto  | 0 | 1 | 3 | 1 | 5 |
| 56 | horns      | cuernos    | 0 | 1 | 2 | 0 | 3 |
| 58 | bones      | huesos     | 0 | 1 | 1 | 0 | 2 |
| 59 | dentist    | dentisita  | 3 | 1 | 3 | 1 | 8 |
| 61 | sew        | coser      | 0 | 1 | 1 | 1 | 3 |
| 63 | raccoon    | mapache    | 0 | 1 | 0 | 0 | 1 |
| 65 | cut        | cortar     | 3 | 1 | 2 | 1 | 7 |
| 66 | statue     | estatuas   | 0 | 1 | 2 | 1 | 4 |
| 67 | rectangle  | rectangulo | 3 | 1 | 3 | 1 | 8 |
| 68 | telescope  | telescopio | 3 | 1 | 3 | 1 | 8 |
| 69 | trumpet    | trompeta   | 3 | 1 | 3 | 1 | 8 |
| 70 | furniture  | muebles    | 0 | 1 | 0 | 0 | 1 |
| 71 | paw        | pata       | 3 | 1 | 2 | 0 | 6 |
| 72 | waterfall  | cascada    | 0 | 2 | 0 | 0 | 2 |
| 73 | pyramids   | piramides  | 3 | 1 | 3 | 1 | 8 |
| 75 | measure    | medir      | 3 | 2 | 1 | 1 | 7 |

|     |             |              |   |   |   |   |    |
|-----|-------------|--------------|---|---|---|---|----|
| 76  | mail        | correo       | 0 | 0 | 0 | 0 | 0  |
| 78  | ostrich     | avestruz     | 0 | 1 | 2 | 0 | 4  |
| 79  | thermometer | termometro   | 0 | 1 | 2 | 0 | 3  |
| 81  | percentage  | porcentaje   | 3 | 1 | 2 | 1 | 7  |
| 83  | shield      | escudo       | 0 | 0 | 1 | 0 | 1  |
| 84  | chess       | ajedrez      | 0 | 0 | 1 | 0 | 1  |
| 85  | stool       | taburete     | 1 | 0 | 1 | 0 | 2  |
| 86  | compass     | brujula      | 0 | 1 | 0 | 0 | 1  |
| 87  | lobster     | langosta     | 3 | 1 | 2 | 0 | 6  |
| 88  | reptiles    | reptil(es)   | 3 | 1 | 3 | 1 | 8  |
| 89  | microphone  | microfono    | 3 | 1 | 3 | 1 | 8  |
| 91  | stadium     | estadio      | 0 | 1 | 3 | 1 | 5  |
| 93  | laptop      | computador   | 0 | 0 | 1 | 0 | 1  |
| 94  | fraction    | fraccion     | 3 | 2 | 3 | 1 | 9  |
| 95  | boomerang   | bumerang     | 3 | 2 | 3 | 2 | 10 |
| 96  | skydiving   | paracaidismo | 0 | 0 | 2 | 1 | 3  |
| 97  | eclipse     | eclipse      | 0 | 1 | 3 | 0 | 4  |
| 98  | spring      | muelle       | 0 | 1 | 0 | 0 | 1  |
| 99  | hexagon     | hexagono     | 0 | 1 | 3 | 1 | 5  |
| 100 | banjo       | banjo        | 3 | 2 | 3 | 2 | 10 |
| 101 | celery      | apio         | 0 | 1 | 0 | 0 | 1  |
| 102 | microscope  | microscopio  | 3 | 1 | 3 | 1 | 8  |
| 103 | tweezers    | pinzas       | 1 | 2 | 2 | 0 | 5  |
| 104 | wheelbarrow | carretilla   | 0 | 1 | 1 | 1 | 3  |
| 106 | saddle      | silla        | 3 | 2 | 1 | 1 | 7  |
| 108 | hammock     | hamaca       | 0 | 1 | 2 | 0 | 3  |
| 109 | Africa      | Africa       | 2 | 2 | 3 | 2 | 9  |
| 110 | water       | agua         | 0 | 2 | 0 | 0 | 2  |
| 111 | directions  | direcciones  | 3 | 1 | 3 | 1 | 8  |
| 112 | symbols     | simbolos     | 3 | 1 | 3 | 1 | 8  |
| 113 | stump       | tronco       | 1 | 1 | 1 | 0 | 3  |

|                    |               |               |   |   |   |   |    |
|--------------------|---------------|---------------|---|---|---|---|----|
| 115                | mushrooms     | hongos        | 0 | 2 | 1 | 0 | 3  |
| 116                | greenhouse    | invernadero   | 0 | 0 | 1 | 0 | 1  |
| 117                | galaxy        | galaxia       | 3 | 2 | 3 | 1 | 9  |
| 118                | skyscraper    | rascacielos   | 0 | 1 | 2 | 1 | 4  |
| 119                | cactus        | cactus        | 3 | 2 | 3 | 2 | 10 |
| 120                | funnel        | embudo        | 0 | 1 | 0 | 0 | 1  |
| 121                | origami       | origami       | 2 | 2 | 3 | 2 | 9  |
| 122                | dock          | muelle        | 0 | 1 | 0 | 0 | 1  |
| 124                | column        | columna       | 3 | 1 | 3 | 1 | 8  |
| 125                | asparagus     | esparragos    | 0 | 2 | 3 | 0 | 5  |
| 126                | clarinet      | clarinete     | 3 | 1 | 3 | 1 | 8  |
| 127                | protractor    | transportador | 1 | 1 | 2 | 1 | 5  |
| 128                | tripod        | tripode       | 3 | 1 | 3 | 0 | 7  |
| 129                | hieroglyphics | jeroglíficos  | 3 | 1 | 3 | 1 | 8  |
| 130                | thermostat    | termostato    | 0 | 1 | 2 | 1 | 4  |
| 131                | gears         | engranajes    | 0 | 0 | 1 | 0 | 1  |
| 133                | stethoscope   | estetoscopio  | 0 | 0 | 3 | 1 | 4  |
| 134                | parallelogram | paralelogramo | 3 | 1 | 3 | 2 | 9  |
| 135                | observatory   | observatorio  | 2 | 2 | 3 | 1 | 8  |
| 136                | beret         | boina         | 3 | 2 | 1 | 0 | 6  |
| 137                | kayak         | kayac         | 3 | 2 | 2 | 1 | 8  |
| 138                | sphinx        | esfinge       | 0 | 0 | 2 | 0 | 2  |
| 139                | otter         | nutria        | 0 | 1 | 1 | 0 | 2  |
| 140                | bulldozer     | excavadora    | 0 | 0 | 1 | 0 | 1  |
| 141                | percussion    | percusion     | 3 | 2 | 2 | 0 | 7  |
| 142                | prescription  | receta        | 0 | 2 | 1 | 0 | 3  |
| 143                | candelabra    | candelabro    | 3 | 2 | 3 | 1 | 9  |
| Total 117<br>pairs |               |               |   |   |   |   |    |

*Note.* COSP = Crosslinguistic Overlap Scale for Phonology (Kelley & Kohnert, 2012). Four features are considered in the COSP: initial sound (3 = same consonant, 2 = same vowel, 1 = similar sound -if they shared two of the three features of place, manner, and voice, or at least one of the same sounds of a consonant cluster-, 0 = complete mismatch), number of syllables (2 = same number of syllables, 1 = different by 1 syllable, 0 = different by more than 1 syllable), consonants (3 = > 70% overlap, 2 = 50 - 70% overlap, 1 = < 50% overlap, 0 = complete mismatch), and vowels (2 = > 80% overlap, 1 = 50% - 80% overlap, 0 = no vowel overlap).

## Instructions

1. Count all the phonemes in each word, even if they repeat.
2. Count plurals.
3. Count diphthongs as two separate vowels.
4. Compare phonemes from the word with fewer phonemes toward the word with more phonemes. For example, we compare the consonants in heart to the consonants in *corazón*.
5. Compare English and Spanish phonemes and mark the ones that are present in both languages. If a phoneme is present twice or more in one language and only once in the other, we only consider it once. For example, *patineta* in Spanish contains two /t/ and skateboard contains one. Only one of the /t/ Spanish phonemes is considered overlapped.
6. Consider the following phonemes overlapped between languages even if they are not pronounced exactly the same: Spanish trill /r/ and English approximant /ɹ/ (e.g., rectangle and *rectángulo*), Spanish /s/ and English /z/ (e.g., bones /boʊnz/ and *huesos*), and Spanish /b/ and English /v/ (e.g., observatorio and *observatorio* /obserbatorio/).
7. When English /d/ or /t/ could be pronounced with a flapped /ɾ/ as in butter, consider flapped /ɾ/ to correspond to Spanish /d/ or /t/ only if there is a grapheme correspondence. For example, we consider English /ɾ/ to correspond to /t/ in the pair thermometer-*termómetro* (/θəˈmæməɾə/-/termómetro/), but we do not consider English /ɾ/ to correspond to Spanish /d/ in the pair waterfall-cascada (/wɔːɾəfɔːl/ - /kaskada/).
8. Consider the following vowel correspondence: Spanish /a/ = English /æ/, /ɑ:/, and /ʌ/; Spanish /i/ = English /ɪ/ and /i:/; Spanish /e/ = English /e/ and /ɛ/, Spanish /o/ = English /o/ and /ɔ:/; and Spanish /u/ = English /ʊ/ and /u:/.
9. Schwas can correspond to any Spanish vowel if when the schwa is stressed becomes the same Spanish vowel. For example, we consider the English /ə/ in “dentist” /dəntɪst/ to correspond to Spanish /i/ in “dentista” /dentista/, but we do not consider English /ə/ in “basket” /bæskɪt/ to correspond to Spanish /a/ in “canasta” /kanasta/.
10. Count R-colored vowels as one vowel. R-vowels do not correspond to any Spanish vowel.
11. Once phonemes and vowels are compared across languages, divide the number of consonants overlapped by the total number of consonants in a word and multiply by 100%. Do the same for vowels.
12. Do not round percentages.
13. Get the score corresponding to the percentage you obtained from the COSP scale.
